# Supplementary material for: Eyes shut homolog is important for the maintenance of photoreceptor morphology and visual function in zebrafish
Source: PubMed Central journal article supplement (PMC6063403; doi:10.1371/journal.pone.0200789), 2018-07-27
Supplement: pone.0200789.s005.pdf [file pone.0200789.s005.pdf]

## S2 Fig. Multiple sequence alignment of EYS protein in different species

|            |       |                                                                 |
|------------|-------|-----------------------------------------------------------------|
| Human      | (1)   | --MTDKSIVIIISLMVFHSSFTIN-GKTCRRQLVEEWHQPSSYVNVNWTLTENICLDYRDC   |
| Macaque    | (1)   | --MTDKSIIIIISLMVFHSSFTIN-GKTCRRELVEEWHQPSSHVNVNWTLTENICLDYRDC   |
| Chicken    | (1)   | --MTPKSTVHMVVCFLQLCIVKGGIICERQITAEWRVEPKHVLTEWTLRKNICTDFYSEC    |
| Zebrafish  | (1)   | MRNPKLAIIVFLLSCVIYGPVYSQVTCRRATSRWHTOPKNI SVRWTLMENTCSSLTQCW    |
| Drosophila | (1)   | -----                                                           |
|            |       | Signal peptide                                                  |
| Human      | (58)  | WFLGVN-TKIDTSGNQAVPQICPLQLQLGDTLVISSEPSLQFPEINLMNVSETSEVIGCVQ   |
| Macaque    | (58)  | WFLGVN-TKIDTSGNQVVPQICPLQLQLGDTLVISSEPSLQFPEINLMNVSETSEVIGCVQ   |
| Chicken    | (59)  | WNVNKN-ATREDKN-LSVPQICPVQLQLGDTLFISSSEPSFQSYGMNLVNVSKKEEFINCPK  |
| Zebrafish  | (61)  | SSFATENGHFWTIGPYHFPQLCPLEQLGDTLFFVSADGTLAQHGVLTKVSKKEEFDKCAI    |
| Drosophila | (1)   | -----                                                           |
| Human      | (117) | NTTTEQQLLFGCRLKGMHTVNSKWL SVGTHYFITVMASGPSPCPIGLRLNVTVKQQFCQE   |
| Macaque    | (117) | NTTTEQQLLFGCRLKGMHTVNSKWL SVGTHYFITVMASGPSPCPIGLRLNVTVKQQFCQE   |
| Chicken    | (117) | IGFLQEQQIFVCOIRGLHQVDSTWLVGVGTHYFAEIHKRGPYLONMGLRLNVTVKQQFCQE   |
| Zebrafish  | (121) | LEPRKEQLVFASSINGTLQVESKWLMSGLNYFTIINRGSSHLCRFGLRIAVLVKPOLCQS    |
| Drosophila | (1)   | -----                                                           |
| Human      | (177) | SLSSEFCSGHGKCLSEAWSKITYSCHCQPPFSGKYCQELDACSFKPCKNNGSCINKR-ENW   |
| Macaque    | (177) | SLSSEFCSGHGKCLSEAWSKITYSCHCQPPFSGKYCQELDACSFKPCKNDGSCINKR-GNW   |
| Chicken    | (177) | TPNAPLCSKHGRCLSRVWEKQYSCHCFSQYSGKFCQKFNVCSTKPCHNNASCTEK--LEG    |
| Zebrafish  | (181) | SPLLRLCSGKGECRITLTKDDSFTCRCHKHFSGRYCEENVDCGYEQPCLNGGTCISEGSAYT  |
| Drosophila | (1)   | -----                                                           |
|            |       | EGF domain                                                      |
|            |       | EGF domain                                                      |
| Human      | (236) | DEQAYECVCHPPFTGKNCSEIIG-QCQPHVCFHGNCSNITSNSFICECDEQFSGPFCEVS    |
| Macaque    | (236) | DEQGYECVCHPPFTGKNCSEIIV-QCQPHVCFHGNCSNITSNSFICECDEQFSGPFCEVS    |
| Chicken    | (235) | IRNSYECTCPPEFSGKNCIEIVG-QCQPHVCFHGNCSNITSNSFICECDEQFSGPFCEVS    |
| Zebrafish  | (241) | DLPPYTCICPAPFTGVNCEIIGNQNC SKWCKEGACLKVSSTSRCECFTGYTGTVCERK     |
| Drosophila | (1)   | -----                                                           |
|            |       | EGF domain                                                      |
| Human      | (295) | AKPCVSLFWKRGICPNSSSAYTYECPKGSSSQNGETDVSEFSLVPCQNGTDCIKISNDV     |
| Macaque    | (295) | TKPCVSLLCWKRGCIPNSSSAYTYECPKGPSSQNGETDVSECSLILCENGTGDIKISNDV    |
| Chicken    | (294) | GDPCASQPCLNRGVQYNQSGYICDPCPAGFLGQDCEVDINECSSRPFQNRGTCLIDPNDV    |
| Zebrafish  | (301) | RLFCDNPCRNDGRCEE TANGYVCTCPGGFTGLNCETTAEADSYCKSSGCQLDEACATD     |
| Drosophila | (1)   | -----                                                           |
|            |       | EGF domain                                                      |
| Human      | (355) | MCICSPIFTDLLCKSIQTSCESEFPLRNNATCKKCEKDYPCSCISGFTTEKNCEKAIDHCKL  |
| Macaque    | (355) | MCICSPIFTDLLCKSFQTSCESEFPLKNNATFKKCEKDYHCSCMSGFTGKNCCEVIDHCKL   |
| Chicken    | (354) | SCSCLPFTGKFCERILNPCELLPCLNNATCVSEQQNYKCRCPGFTGKNCCEVIDYCKL      |
| Zebrafish  | (360) | KLNAICICVDPECLEQAEVCGITLPCLNNGGICVVPNGQYHRCRCRQGFSGKNCEEVIDFCKL |
| Drosophila | (1)   | -----MSNV                                                       |
|            |       | EGF-like domain                                                 |
| Human      | (415) | LSINCLNEEWCFNIIGRFKYVCIIPGCTKNPCWFLKNVYLIHQHLCYCGVTFHGCQDKGP    |
| Macaque    | (415) | LSINCLNEEWCFNIIGRFKYVCIIPGCTKNPFWFLKNVHLIHLHPCYYGITFHGICQDKGP   |
| Chicken    | (414) | LSINCLNEGLCLNIIGGFTCLCAPGWTGEFCQVAENACLIYPKSCSNGSTCIDMSQLGEQ    |
| Zebrafish  | (420) | LNINCLNEGLCLNRVGGYNCLCAPGWTGEFCQYLENACLAYPNRCLNGATCISMSQTTAP    |
| Drosophila | (5)   | HQFDQTMAESPQIRRDGRLCATWPSKDS EDGAGTALRAATPLTANGATTTGLSVTLAP     |
|            |       | EGF-CA domain                                                   |

Human (475) AQFEYVWQLGFAGS-----EGEKQCGVIDA  
Macaque (475) AHFEYVWQLGFTGS-----EGEKQCGVIDA  
Chicken (474) PLFQCLCPHGFTGEFCKVQIDNCNSNLCENGGTCVNYEDHFKCICPMGFEGERCELDIDV  
Zebrafish (480) PHVMCTCLPGYTGPYCEAEVNECDSSPCQHGTCTDFVGYKCTCPSGYTGIDCEIDINS  
Drosophila (65) KDMQRNHLKMPAT-----

Human (500) YFFLAANCTEDATYVNDPEDNNSCWFPHEGKTEICANGCSCLEEDSQEYRYLCFLRWA  
Macaque (500) YFFLTANCTEDATYVNNPEDNNSCSFPCGKTEICANGCSCLEEDNQEYRYLCFLRWT  
Chicken (534) CLFYNISCAPGAVCMNKSHGFNYTCLSPICGKTEVCANGGSCFYDEGNQRSHCVCAHGWT  
Zebrafish (540) CWLPNATCPPEITCVDLPGDLFKHTPCPHYLQPCANGGHCVLHN-ITSYSCVAPGWT  
Drosophila (80) -----IEKPTITATASS-----SSTS-----TSTRKSVTATRSIKLKN

Human (560) GNMYLENTTDDQENECQHEAVCKDEINRPRCSCSLSYIGRLCVVNVVDYCLGNHSISVHGL  
Macaque (560) SNMYLENITDDQENKQHEAICEDEINRPRCSCSLSYIGRLCVVNVVDYCLGNQSI SVHGL  
Chicken (594) GQTCLENINDCEINQCQHGATCEDEVNKYRCICPLGYTGTFCETIDNDCIGN-QCSEYGF  
Zebrafish (599) GATCLVNIINECVQHRQNRATCVDEVGGYSCLCGHGYTGVCETDFCSGHQC---SEHAV  
Drosophila (114) PNTLPTLRILARGLLLPAIILAILVG--SSQAGFACLSNPFVFGVICDGLN---SSYSC  
EGF domain

Human (620) CLALSHNCNCSGLQRYERNICEIDTEDCKSASCNKG-----  
Macaque (620) CLALSHNCNCSDLQRYEGNICEIDTEDCKSVSCNKG-----  
Chicken (653) CQDHLHNYSCICMLGYGGPFCEVEINECSSSPCKNGGICMNLIGSFSCHCAEGFGETCT  
Zebrafish (656) CVDQQHNYTCRCMLGYEGTICELETEDECKSAPCTNNATCIDLVAGYQCLCAPGFKGRTCS  
Drosophila (169) YCIDG-----YTGIIQCQTNWDECWSSPCQNG-----

Human (656) -----  
Macaque (656) -----  
Chicken (713) AHVNECLDRPCWNGGTCEEEDINGFKCNCPLGFEGLNCEINFDECTYGFCKNNSTCLDLIA  
Zebrafish (716) ESMNECWSRPCNNGGSCIDLVDNYICNCPGFTGHDCSMPATGCTSNPCNTKGTSMCEEQ  
Drosophila (195) -----

Human (656) -----  
Macaque (656) -----  
Chicken (773) --DYSCVCPGFTDKNCSTDIDECAFKPCQNGGHCHNLIGEFYCSCLPGFTGQFCEADVA  
Zebrafish (776) QDGFKCVCHHGYTGLFCETSINHCVEGLCHHGSECVDLTKGFMCECLPGLRGRLECVNID  
Drosophila (195) -----

Human (656) -----  
Macaque (656) -----  
Chicken (831) ACLSQPCGASSICKDMSDGYVCFAPGFIGNCEIEVDECLSDPCHSGATCIDHLNGFSC  
Zebrafish (836) DCLDKPCGALSICKDGINAYDCFCAPGVGNCEIEVNECLSQPCQNGASCSDLENSFSC  
Drosophila (195) -----

Human (656) -----TSTHLRGYFFRKCVPGFKCTQCEIDIDECASHP  
Macaque (656) -----TSTHLRGYFFYKCVPGFKGTRCEIDLDECALHP  
Chicken (891) ICQGGFQGTTCETNINECHSSPCLHNAATCADFVGGYECICLPGFTGTRCETDIDECASSP  
Zebrafish (896) LCLAGTTGSLCEINIDECQSSPCMNNGTCLDLSDFKICICPSGFSGPECSMDINECVSYF  
Drosophila (195) -----GTCVDGVAYYNCTCPEGFSGSNCEENVDECMSNP

Human (690) CKNGATCIDQPGNYFCQCVPPFK-----  
Macaque (690) CKSGATCIDQPGNYFCQCGPPFK-----  
Chicken (951) CKNGATCIDQPGNYFCQCMAPFKGLNCFRPPCEASNPCENGAVCTEEMNLDAFPLGFQCG  
Zebrafish (956) CKNGGSCIDQPGNYVCRCLAPFKGLNCELLPCEAVNPCDNGAECVEEADLVLPPLGFQCR  
Drosophila (229) CQNGGLCRDR-----  
EGF-CA domain

Human (713) -----VVDGFSCLCNPGYVGLRCEQDIDDCLLNACE  
 Macaque (713) -----VVDGFSCLCNPGYVGLRCEQNIDNCLLNAFE  
 Chicken (1011) CVKGFAGPRCEINVNECSSNPCLHGICYDINVGFYCLCNPGYAGLTCEQDIDDCLLNACE  
 Zebrafish (1016) CRKGFAGPRCEINVNECSSNPCLHGICYDINVGFYCLCNPGYAGVLRCEQHINDCASNMCE  
 Drosophila (239) -----TNGYICTCQPGYLGSHCELVDVAVCETGTGA

Human (744) ----HNSTCKDLHLSYQCVCVLSDWEGNFCEQESNECKMNPCKNNSTCTDLYKSYRCECTS  
 Macaque (744) ----HNSTYKDLHLSYQCVCVLSGWEGNFCEQESNECKMNPCKNNSTCTDLYKSYRCECTS  
 Chicken (1071) ----HNSTCVDLHLRYQCVCVLPGWEGTFCEYESNECDSEPCRNNGTCTDLFNSYRCLCTA  
 Zebrafish (1076) ----HNSTCVDLHLSYNCLCLPGWEGEYCYQREINECLSNPCKNNATCTDLLNAYRCVCPQ  
 Drosophila (269) RCQHGGECEIEGPELEHTCDCPAGWHRICQEEINECASSPCQNGGVQVDKLAAYACACPM

EGF-CA domain EGF-CA domain

Human (800) GWTGQNCSEIEINECDSDPCMNGGLCHESTIPGQFVCLCPPLYTGQFCHQRYNLCPLLHNP  
 Macaque (800) GWTGQNCSEIEINECDSDPCMNGGLCHESTIPGQFVCLCPPLYTGQFCHQRYNLCPLLHNP  
 Chicken (1127) GWTGPDCEIDINECDSEPCNGATGCTYVESVQKQGFVCTCPFFYTGDFCHQRFSPCLPYNP  
 Zebrafish (1132) GWTGLDCDEEDVKECSSSPCLNGAHCVESDTPGEFSCTCPPFFTGPLCEQPYDPCLQPNP  
 Drosophila (329) GYTGINCEEEILLICADNPQNNALCLMEEG--VPTCYQVDPYHGEKCEFOYDECOLG---

EGF domain

Human (860) CRNNSTCLALVDANQHCICREEFEGKNCIDVKECLFLSCQDYGDCEDMVNNFRCTCRPG  
 Macaque (860) CRNNSTCLALVDGNQHCICREEFEGKHCIDVKECLFLSCQDYGDCEDMVNNFRCTCRPG  
 Chicken (1187) CINNSTCLAQADGNPMCICKTGTGCTYCEVNSDECTSHPCQNEGLCVDGINSYSCFCEPG  
 Zebrafish (1192) CLHNSTCRAQSDGTALCVCPVGFEGTRCEIDSDCVSRPCQNRGLCVDGVNSYSCFCEPG  
 Drosophila (384) -----PRCMNG---GVCIDGVDTFSCSCPPL

EGF domain

EGF-domain

Human (920) FSGSLICEIEINECSSEPCCKNNGTCVDLTNRFFCNCEPEYHGFPCELDVNKCKISPCLDDEE  
 Macaque (920) FSGSLICEIEINECSSEPCCKNNGTCVDLTNRFFCNCEPGYHGFPCELDVNKCKISPCLDDEE  
 Chicken (1247) FTGTLCEVEINECLSRPCCKNNGTCVDLTNRFFCNCEAPGYHGFPCELDVNKCKISPCLDDEE  
 Zebrafish (1252) FSGLHCEEIDINECASNPQNAVQCQDLVNGFQCSCVPGYFGPHCNLDVNECDSPCLHES  
 Drosophila (407) LIGMLICECLMVGEESLDCNYTAPATQSPRRRTTTTSTMAPPTVRVTPPETTVSPSR---

EGF-CA domain

Human (980) NCVYRTDGYNCLCAPGYTGINCEINLDECLSEPCLDHGVCIDGINHYTCDCKSGFFGTHC  
 Macaque (980) NCVYRTDRYNCLCAPGYTGINCEINLDECLSEPCLDHGVCIDGINHYTCDCKSGFFGTHC  
 Chicken (1307) SCINRLGGYQCFCSPEFTGDRCEINTDECLSTPCLNNGSCIDDINSYKCHCRSGFHTGNC  
 Zebrafish (1312) VCNLPPGGFACVCSAGFSGKWCELVNDECLSNPCRNNGSCIDGLNGYQCVCSRGMFDHC  
 Drosophila (464) ---ASEVVEIIVTTSAPAEVVTSVLSPSSSSSSSEEGVSVIEIKTPTVAPPESCShSISV

EGF domain

EGF-CA domain

Human (1040) ETNANDCL-SNFCPLHGRCTELINEYPCSCDADGTSIQCKIKINDCTSIPCMNEGF----C  
 Macaque (1040) ETNANDCL-SNFCPLHGRCTEPINEYPCSCDADGTSIQCKIKINDCTSMPCMNEGF----C  
 Chicken (1367) ETNVNECW-PEPCLHGRCIDLDIGYQCSCEAGWTSRCEININECESVPCINGGS----C  
 Zebrafish (1372) ERNTDECS-SGFCVHGSCLEIDAISQCEVGTGHRCQININECEAHPCLNGGS----C  
 Drosophila (521) EQTTAVPAQPEPESEQEPESKHPPESESASESETTEEEIIPGTTARPTSRSSSSSEES

EGF-like domain

Human (1095) QKSAHGFTCICPRGYTGAYCEKSIDNCAEPELNSVLCNNGICVDGPGHTFDCRCLPGFS  
 Macaque (1095) QKSAHGFTCICPRGYTGAYCEKSIDNCAEPELNSVLCNNGICVDGPGHTFDCRCLPGFS  
 Chicken (1422) QDLVNEFACICLTGYTGKFCFDIDLICNEPTVSSVLCNNGVVDGPGRTFHCRCLAGFS  
 Zebrafish (1427) VDLVDKYACICADGFTGKNCIDIDQVCLQTSLNFSLCFNGGTVDGPGVNFCTCSRPGFM  
 Drosophila (581) PSIFFTLPPIPGKQTSASSESSGVTSEEYTVPHFEVSGSKSESSEEVTTVRPTA

EGF domain

EGF domain

Human (1155) GQFCEININECSSPCLHGADCEDHINGYVCKCQPGWSGHHCEK-ELECIPNSCVHELICM  
 Macaque (1155) GQFCEININECSSPCLHGANCEDHINGYVCKCQPGWSGHHCEK-ELECVPNSCVHQLCM  
 Chicken (1482) GQFCEIEVNECNSSPCLHGSTCEDHNGYTCQCKGWEGHLCELVDDECISNPCIHGICV  
 Zebrafish (1487) GDFCEVEMNECCSEPCFNAGICQDLINGYQCHCRPGWTGLHCEDDINECLLQPCNQGMCI  
 Drosophila (640) APSITLSDITSSGSSSSSSSESVVFTTTPAPVFVQRVTTIETSISIDYVTPPTPLPETTTP

EGF-CA domain

|            |        |                                                              |
|------------|--------|--------------------------------------------------------------|
| Human      | (1214) | ENEP--GSTCLCTPGFMTCSIGLLCGDEIRRITCLTPIFQRTDPISTQTYTTPPSETLVS |
| Macaque    | (1214) | ENEP--GSTCLCTPGFMTCSIGLLCGDEIRRITCLTPIFQRTDPISTQTHTVPPSETLVS |
| Chicken    | (1542) | QSDPSFGYSCFCRPGFVGRSCELYNDCLIQSCSSGFLCVDGINNITCLPTISQS-----  |
| Zebrafish  | (1547) | QNEPGHGYTCFCRPGFVGENCEYNYDDCLIQSCPETFSCKDGINNVSCVPVKTDSSSLP- |
| Drosophila | (700)  | RVVIVPRPTFAPEPLDVVETTASTHHLWTEVPTTAAPFFTEYPAEVLITTHRTSAG---  |

EGF-like domain

|            |        |                                                              |
|------------|--------|--------------------------------------------------------------|
| Human      | (1272) | SFPSIKATRIPALMDTYPVDOGPKQTGIVKHDILPTTGLATLRISTPIESYLLQELIVTR |
| Macaque    | (1272) | SFPSIKATRIPALMDTYPVDOGPKQTGIVKHDILPTTGLATLRISTPKSYLLEELIVTR  |
| Chicken    | (1597) | -----KKTEMAELFPTESLDN-----DLPSALAVSM                         |
| Zebrafish  | (1606) | -----PISVVSWRSTDIIST                                         |
| Drosophila | (757)  | -----RFTTVQPPAGVTT                                           |

|            |        |                                                              |
|------------|--------|--------------------------------------------------------------|
| Human      | (1332) | ELSAKHSLLSSADVSSSRFLNFGIRDPAQIVQDKTSVSHMPIRTSAATLGFFFPDRRART |
| Macaque    | (1332) | ELSAKHSLLSSTDVSSSPFLNFGIHDPAQIVQDKTSVSHMRIRTSAATLGFFFPDRRART |
| Chicken    | (1623) | ELWSKHAIP-----                                               |
| Zebrafish  | (1620) | ELQPTFAIPVEN-----                                            |
| Drosophila | (770)  | TSPTEDSSVELP-----                                            |

|            |        |                                                              |
|------------|--------|--------------------------------------------------------------|
| Human      | (1392) | PFIMSSLMSDFIFPTQSLLFENCQTVALSATPTTSVIRSIPGADIELNRQSLLSRGFLLI |
| Macaque    | (1392) | SFIRSSLMSDFIFPTQSLLFENYQTVASSATPTTSVIRSIPGADIELNRHSLLSRGFLLT |
| Chicken    | (1632) | -----                                                        |
| Zebrafish  | (1631) | -----                                                        |
| Drosophila | (782)  | -----                                                        |

|            |        |                                                                |
|------------|--------|----------------------------------------------------------------|
| Human      | (1452) | AASISATPVVSRGAQEDIIEEYSADSLISRREHWRLLSPSMSPIFFPAKVIISKQVTILNSS |
| Macaque    | (1452) | AASISATPVVSRGAQEDIKEYSAVSLISRREHWRLISSMSPIFFPAKKIISKQVTILNSS   |
| Chicken    | (1632) | -----                                                          |
| Zebrafish  | (1631) | -----                                                          |
| Drosophila | (782)  | -----                                                          |

|            |        |                                                               |
|------------|--------|---------------------------------------------------------------|
| Human      | (1512) | ALHRFSTKAFNPSEYQAI TEASSNQLRTNIKSQAADSLRELSQTCATCSMTEIKSSREFS |
| Macaque    | (1512) | ALHRFGTKAFIPSEYQAI TEASSNQLRTNIKSQAADSLRELSQTCATCSMTEIKSSHEFS |
| Chicken    | (1632) | -----D--FHTEEVA                                               |
| Zebrafish  | (1631) | -----IQHTEQPA                                                 |
| Drosophila | (782)  | -----TPHTPQIV                                                 |

|            |        |                                                               |
|------------|--------|---------------------------------------------------------------|
| Human      | (1572) | DQVLHSSKQSHFYETFWMNSAILASWYALMGAQTITSGHSFSSATEITPSVAFTEVPSLFP |
| Macaque    | (1572) | DQVLHSSKQSHFYETFWMNSAILASWYALMGAQTITSGHSFSSATEITPSVAFTEVPSLFP |
| Chicken    | (1640) | --QDFS-----                                                   |
| Zebrafish  | (1639) | DASFSG-----                                                   |
| Drosophila | (790)  | VTILDSN-----                                                  |

|            |        |                                                               |
|------------|--------|---------------------------------------------------------------|
| Human      | (1632) | SKKSAKRTILSSSLEESITLSSNLDVNLCLDKTCLSI VPSQTISSDLMNSDLTSKMTTDE |
| Macaque    | (1632) | SKKSAKRTILSSSLEESITLSSNLDVNLCLDKTCLSI VPSQTISSDLMNSDLTSELTTDE |
| Chicken    | (1644) | -----                                                         |
| Zebrafish  | (1645) | -----                                                         |
| Drosophila | (797)  | -----                                                         |

|            |        |                                                              |
|------------|--------|--------------------------------------------------------------|
| Human      | (1692) | LSVSENILKLLKIRQYGITMGPTVNLNQESLLDMEKSKGSHTLFLKHPDSSSLDFELNLQ |
| Macaque    | (1692) | LSVSENILKLLKIRQYGITMGPTVNLNQDSLLDMEKSKGSHTPFKHPDSSSLDLELNLR  |
| Chicken    | (1644) | -----                                                        |
| Zebrafish  | (1645) | -----                                                        |
| Drosophila | (797)  | -----                                                        |

Human (1752) IYPDVTLKTYSEITHANDFKNNLPLLTGSPDFSEVTTNVAFYTVSATPALSIQTSSSMS  
 Macaque (1752) SYPDVTLKTYSEITLANDLKNLPLLTGSPDFSEVTTNVAFYTVSATPALPIQTSSSMS  
 Chicken (1644) -----  
 Zebrafish (1645) -----  
 Drosophila (797) -----

Human (1812) VIRPDWPFYFTDYMTSLKKEVKTSSEWSKWELQPSVQYQEFPTASRHLPFTRSLTLSSLES  
 Macaque (1812) VITPDWPFYFIDYMTSLNKEVKTYSEWSKWELQPSVQYQEFPTASWHLPFTRSLTLSSLES  
 Chicken (1644) -----  
 Zebrafish (1645) -----  
 Drosophila (797) -----

Human (1872) ILAPQRLMISDFSCVRYYGDSYLEFQNVVALNPQNNISLEFQTFSSYGLLLYVKQDSNLVD  
 Macaque (1872) IVAPQQLMISDFSCVCYYGDSYLEFQNVVVLNPQNNISLEFQTFSSYGLLLYVKQDSNLVD  
 Chicken (1644) -YA-----RYYGDSYLEFQGIHLNVQNFHLEFKTYKPDGLLLYIEESSETIG  
 Zebrafish (1645) -----YSGNSFLEFGGFVAVPISVTVRFQTESMYGTLLYS--ASAKRS  
 Drosophila (797) -----EVIPSITTTGSPPTHHHHHHHPHHEAEGTTLQPLEEDEHHHHHHDEFTT  
Laminin-G domain

Human (1932) GFFIQLEIENGLTKYHFYCPGEAKFKSINTTVRVDNGQKYTLIRQELDPCKAELTILGR  
 Macaque (1932) GFFIQLSIENGLTKYHFYCPGEAKFKSINTAIRVDDGQKYTLIRQELDPCKAELTILGR  
 Chicken (1691) QFLIQLEIRHGILQYQFVCGKATQVKNITTTARVDDGQYKQVIRQNMKPCAEMLILEV  
 Zebrafish (1687) VFFIKLYISNGILQYDFLCNQKQVQRINTAQWVADGNEHVVFQCLFPCVAEIVTVSGV  
 Drosophila (848) PQPVEITTGHPLOTEDLIGVQEPAVVITESPFAFATTVVPPVVPATIAPLGTAAPPATP  
Laminin-G domain

Human (1992) NTQICESINHVLGKPLPKSGSVFIGGFDDLHGKIOMPVPVKNFTGCIEVIEINNWRSFIP  
 Macaque (1992) NTQTCE SINHVLGKPLPKSGSVFIGGFDDLRGKIOMPVPVKNFTGCIEVIEINNWRSFIP  
 Chicken (1751) SAKTGIPSNFSSPYGLTGSIFVGGLPYSSAIKQIPEPVYNFTGCIQVIEINNVPFNF  
 Zebrafish (1747) RTVRSAPGNYTSLRLRQRTDHFVIGGLPRHRSPYKEAEPFHNVTGCIEIIEINKLRRFHM  
 Drosophila (908) APVPPATTPPPSPSLATEIPTPTLPPVTLPPVTPPPTIPPTPPSTQSAOTLPPPT  
Laminin-G domain

Human (2052) SKAVKNYHINNCRSQGLMLSPTASFVDASDVTQGVDF--TMTSVSPSVAAPSVCCQDVC  
 Macaque (2052) SKAVRNYHINNCRSQGLMLSPTASFVDASDVTQGVDF--AMWTSVSPSVAAPSVCCQEDVC  
 Chicken (1811) SNAVGRRNIDSCRIPVPTHLPPTVSSDVLALPE---LVTPSLT-SPELPSVCCQEGIC  
 Zebrafish (1807) DHAARNNVDNCRSQWHHEPPTSSSTHSPITLITVETPP-GEWVRVLSPTQAPAVCPQGIC  
 Drosophila (968) SAINVYTPDGPPASQTKPSVTESSDEVEGNTVSTGGRGSGGVPEEKACDVCIKLGC  
EGF domain

Human (2109) HNGGTCHAIPLSSGIVSFQDCPLHFTGRFCEKDAGLFFPSPFNCSYLELPLFLKVFLEKE  
 Macaque (2109) HNGGTCRPIFLSSGIVSFQDCPLHFTGRFCEKDAGLFFPSPFNCSYLELPLFLNFVLEKE  
 Chicken (1867) HNGGTCHPISLPTGALSFECDQLHFTGRFCEKDVTLFIPSPFNCSYLELPLSLTSSVQMR  
 Zebrafish (1866) LNGGTCRPVSLPSGASSFFQDCPLHFTGRLCEQDITVFSRFDGNSFLELPLSLTIFQSD  
 Drosophila (1028) YNGGTCVTTSEGS----RCVCRFDRQGPLCELPITIRNAAFSGDSYVSHRIYKDIGGHE  
EGF domain

Human (2169) HN-----RTVTIYLTIKTNSLNGTILYSNGN-NCGKQFLHLFLVEGRPSVKYCGGNSQ  
 Macaque (2169) HN-----RTVTIYLTIKTNSLNGTILYSNGN-NFGKQFLHLFLVEGKPSVKYCGGNSQ  
 Chicken (1927) TASGQETS-NLTTIYLTIVKTTAPSGTILYTSEK-NFGEQFLHLFLVEGRPTVRESCGNSQ  
 Zebrafish (1926) TYFPRSSEDKRIYLTIMKSRTPHGSLLYCREQ-DLGERFLHVLQNAVARAVLCCG-AA  
 Drosophila (1083) SLDAVLP---MHIQLKVRTRATNGLIMLAAAGTKGGHYMALFLQKGLMQFQSCGLQT  
Laminin-G domain

Human (2221) NILTVSAN-----YSINTNAFTPIITRYTTPVGSPPGVVCMIEMTADGKPPVQKIDTEISH  
 Macaque (2221) NILTVSAN-----YSINTNAFTPIITVRHTMPIGSPGVVCMIEMTADGKPPVQKIDTEISH  
 Chicken (1985) NILTVSCN-----QITSKGIFIPITISYMLPVSSLEGYCMIEMAADRNPVQVHLHLSYQ  
 Zebrafish (1984) HILTAVAA-----QNTIRIDSLVAITVRYALPSQNNQICFIEIADNGTANQQQKYMDEP  
 Drosophila (1139) MLLSELETVPVNTGHEITIRAEIDFERNYTHCNASLLVNDTLAMSGDQPTWIKLLPPIHT  
Laminin-G domain

|            |        |                                                                 |
|------------|--------|-----------------------------------------------------------------|
| Human      | (2276) | ASQAYFESMFLGHI PANVQIHKKAG----PVYGFRRGCIILDLQVNNKEFFIIDEARRHKNI |
| Macaque    | (2276) | ASQVYFESMFLGHI PENVQIHKKAG----SVYGFRRGCIILDLQVNNKEFFIIDEARRKNI  |
| Chicken    | (2040) | ASQITFGSTFLGNVPHKEVPECAG----QIRGYKGCIRDFOVNNKELFIIDDAIGRNV      |
| Zebrafish  | (2039) | VSEVVFPGPTFLGGFSPVIELHNSG----NVSGFTGCIRELQMGSKELYVVGEAIRQNI     |
| Drosophila | (1199) | PEALNTWLHLGGAPQAPIGLI IELPPAQSGSGFTCLHTLRINGQAREIFGDAIDGFGI     |

Laminin-G domain

|            |        |                                                             |
|------------|--------|-------------------------------------------------------------|
| Human      | (2332) | ENCHVFWCAHHLCRNNGTCLISDNEN-----LFCECPRLYSGKLCQFASCENNPC     |
| Macaque    | (2332) | ENCHVFWCAHHLCRNNGTCLSDSEN-----LFCECPRLYSGKLCQFASCENNPC      |
| Chicken    | (2096) | ENCNVPICDYHPCRNGGTCTSDAEN-----WFCECPRLYSGRLCQFMICDESPC      |
| Zebrafish  | (2095) | QNCDAAVCQHQP CRNNGTCLISDAES-----WFCACPSLYSGKLCQFTACENPC     |
| Drosophila | (1259) | TECGSLACLSSPCRNGAACIKIETNDLDENGEKAEKWKCKCPTGYMGTCEISVCEDNPC |

EGF domain

|            |        |                                                                |
|------------|--------|----------------------------------------------------------------|
| Human      | (2381) | GNGATCVPKSGTDIVCLCPYGRSGPLCTDAINITQPRFSGTDAFCYTSFLAYSRIISDISF  |
| Macaque    | (2381) | GNGATCVPKSGTDIICLCPYGRSGPLCTDAINITQPRFSGTDAFCYTSFLAYSRIISDISF  |
| Chicken    | (2145) | GNGATCFPKSRQDVVCLCPYGRSGILCNDVNVNISQPSFSGTDVFCYTSFLAYSRIIPDITF |
| Zebrafish  | (2144) | ARGATCVPTQLFAACLCYGRGQLLCEAINITRPFSGLDVFCYSSYVAYPSIPSTGH       |
| Drosophila | (1319) | QYGGTCVQFPGSGYICLCPYGRSGHYCEHNLEVALPSFSG-SVNGLSSEVAYVPIPLEY    |

EGF domain

|            |        |                                                                |
|------------|--------|----------------------------------------------------------------|
| Human      | (2441) | HYEFHLKFKQLANNHSALQNNLIFFTGQKGHGLNGDDFLAVGLLNGSVVYSYNLGSGLIASI |
| Macaque    | (2441) | HYEFHLKFKQLANNHSALQNNLIFFTGQKGHGLNGDDFLAVGLLNGSVVYSYNLGSGLIASI |
| Chicken    | (2205) | YYEFHLKFKQLLNHHSALQNNLIFFTGQKQGLNGDDFLVILGLCDGRVYSYNLGSGLTATI  |
| Zebrafish  | (2204) | FYEFHLKLTTFANNASALRNLIIFSTGQKQGLSGDDFFALGVNRGRIIVHKYNLGSGLATI  |
| Drosophila | (1378) | SLLELSEKILPQTMS---QISLFAFFGQSGYHDEKSDHLAVSFIOGYIMLTWNLGAPRRI   |

Laminin-G domain

|            |        |                                                             |
|------------|--------|-------------------------------------------------------------|
| Human      | (2501) | RSEPF----LNLSLGVHTVHLGKFFQEGWLKVDHKNKSIIPGRLVGLNVFSQFYVGGY  |
| Macaque    | (2501) | RSDPF----LNLSLGVHTVHLGKFFQEGWLKVDHKNKSIIPGRLVGLNVFSQFYVGGY  |
| Chicken    | (2265) | ISKPF----LDLTLNTHVTHLGRVLRQKGLKVDQKNKTTTSPGRLVGLNVFSQFYVGGY |
| Zebrafish  | (2264) | ISDR----LNPRINHTVHFRVLRKGTGLKVNQKRRRTGTS PGPLMGLNTFSQTYVGGY |
| Drosophila | (1435) | FTQKPIDFRLDAPRVPEIKVGRIGRQAWLSVDGKFNITGRSPGSGSRMDVLPILYVGGH |

Laminin-G domain

|            |        |                                                                |
|------------|--------|----------------------------------------------------------------|
| Human      | (2556) | SEYTPDLLPNGADFKNGFOGCIFTIQVRTEKDGHRGLGNPEGHPNAGRSVGGCHASPCS    |
| Macaque    | (2556) | SEYTPDLLPNGADFKNGFOGCIFTIQVRTEKDGHRGLGNPEGHPNAGRSVGGCHASPCS    |
| Chicken    | (2320) | HEYTPDLLPKGSRFKNGFOGCIFDVQVRTNMNQEFPSPGTPEGHPNSGRSVGGCHASPCS   |
| Zebrafish  | (2319) | EEYTPDLLPPGSRFQNSFOGCI FDM LFRTRQDGKEHALGGPDIRELSGRNVGGCHASPCS |
| Drosophila | (1495) | EIANFNTLPHDLPLHSGFOGCIYDVLKAGQVTVP----LQETRGVRCRGVGGCHTRECH    |

Laminin-G domain

|            |        |                                                                 |
|------------|--------|-----------------------------------------------------------------|
| Human      | (2616) | LMKCGNGGTCIESGTSVYCNCTTGWKG SFC TETVSTCDPEHDPPHHC SRGATCISLPHGY |
| Macaque    | (2616) | LMKCGNGGTCIESGTSVYCNCTTRWKGAFCTETVSTCDPEHDPPHHC SRGATCISLPHGY   |
| Chicken    | (2380) | LTKCRNGGKCMESGSTVYCNCLAGWKGAFCTEMVTVCDPEHDPPHLCKQGGTCVPLPNGY    |
| Zebrafish  | (2379) | LVFCHNGGTCVDSGSSVYCOVFGWKGALCSEKVSFCDAEHIPPPFCARGSTCVPLSDGY     |
| Drosophila | (1551) | RHACQHDGACIQHGAFTICIQEGWYGPLCAQPTNPCDSFNN---KCYEDATCVPLVNGY     |

EGF domain

EGF domain

|            |        |                                                            |
|------------|--------|------------------------------------------------------------|
| Human      | (2676) | TCFCPLGTTGIYCEQALISIDPSFRSNE-----                          |
| Macaque    | (2676) | TCFCPLGTTGIYCEQALISIDPSFRSSE-----                          |
| Chicken    | (2440) | MCHCPLGTSPTYCEQDISIDPSFRSNK-----                           |
| Zebrafish  | (2439) | TCQCPLGSAGLHCQQAITISDPFFSGNQ-----                          |
| Drosophila | (1608) | ECDCPVGRTGKNCEVIRSLSDVSLTGRRSYLAVRWPYLYDGGDKLGAKRSQMVSYRNF |

|            |        |                                                            |
|------------|--------|------------------------------------------------------------|
| Human      | (2704) | -----ISWMSFASFHVRRKTHIQIQFOPLA                             |
| Macaque    | (2704) | -----ISWMSFASFHVRRKTHIQIQFOPLA                             |
| Chicken    | (2468) | -----SSWMSFAPFYIRHKTHIKIQFOPLS                             |
| Zebrafish  | (2467) | -----SSWMSFPPINIRHRTHVQIQFOPLS                             |
| Drosophila | (1668) | KKLMPPKPIITPSSHVMKLLNEVEKQRSFSPVPLMGSKSFEHHRVQFFFIETQLRPLS |

|            |        |                                                                |
|------------|--------|----------------------------------------------------------------|
| Human      | (2729) | ADGTLFYYAAQHLKAQSGDFLCISLVNSSLVQLRYNLG-DRTIILETLQKVTINGSTWHIIK |
| Macaque    | (2729) | ADGTLFYYAAQHLKAQSGDFLCISLVNSSLVQLRYNLG-DRTIILETLQKVTINGSTWHIIK |
| Chicken    | (2493) | PDGTLFYTAQRLGTQSGDFLCISLVNGFLQLRYNLG-DKTIVLQAVQKVHADGQTHWHLK   |
| Zebrafish  | (2492) | PEGTLFYTAQHLSTHSGDFLSISLSAGFLQLRYNLG-NQTIVLQSPKELDVTGVRWHTVK   |
| Drosophila | (1728) | ERGLLLYFGLTLNNDKKGIFVSLSLQGGVVEFRISGSPSNHVTVRSVRMLAIGEWKIK     |

Laminin-G domain

|            |        |                                                               |
|------------|--------|---------------------------------------------------------------|
| Human      | (2788) | AGRVCAEGYLDLDGINVTEKASTKMSSLDNTDFYIGGVSSLNLVNPMAIENEVPGFQGC   |
| Macaque    | (2788) | AGRVCAEGYLDLDGINVTEKASTKMSSLDNTDFYIGGVSSLNLVNPMAIENEVPGFHGC   |
| Chicken    | (2552) | VGRVCEGNYDLDGINITHTASAGCMVLDTHDFYVGGVSSLNLVNSMATENEPTGFSGC    |
| Zebrafish  | (2551) | AGRECNNGFLIVDGEVTRNSSESTTLDVGANITIGGISSLNTVSIIDAVEKELVGFSTGG  |
| Drosophila | (1788) | MAQRCRWLTLWVEGSASSALAPSAEVLVEPDSLLEYIGGLKDVSKLPHNAISGFPIIFRGC |

Laminin-G domain

|            |        |                                                              |
|------------|--------|--------------------------------------------------------------|
| Human      | (2848) | IRQVLIINQELQLTEFGAKGGSNVGDCDGTACGYNTCRNGGECTVN-GTTFSCRCPLDWA |
| Macaque    | (2848) | IRQVLIINQELQLTEFGAKGGSNVGDCDGTACGYNTCRNGGECTVN-GTTFSCRCPLDWA |
| Chicken    | (2612) | IRELVINDKELKLVTDPKGGANIGDCDGTVCVGYVCKNNGTQVE-SSGFSCSPQGI     |
| Zebrafish  | (2611) | IREVVNGQELELTETGALDGANVGDWGTACGYKVCKNGGHCHPSGDFSFCTICPSLWT   |
| Drosophila | (1848) | VRGLVVSSTRIVLNETNIVESRNIRDCDGTACGGDSCESGGHCWIDEKLQPHCTCPEYAK |

EGF domain

|            |        |                                                               |
|------------|--------|---------------------------------------------------------------|
| Human      | (2907) | GNTCNQSVSCLNNICLHQSLCIPDQSFS-YSCICLIGWVGRYCNKTSFSTAKFMG-NSY   |
| Macaque    | (2907) | GNTCNQSAAYCLNNICLHQSLCIPDQSFS-YSCICLIGWVGRYCNKTSFTAKFMG-NSY   |
| Chicken    | (2671) | GNTCEESVHCLHNRCSQALCIPQALLSYTCVCPGWSGKHCDSKISFTAKFMG-NSY      |
| Zebrafish  | (2671) | GSRCCQSIQCLNNICQHNVCIHNSISASYSYSCMCSLGTGTGHCREVTLKTIIFLIG-NSY |
| Drosophila | (1908) | GDRCEYSETCKLIPCKNNGRCLRSGRCS----CPNGWGGFYCEIAMSKEPTTPSFRGNSY  |

EGF domain

|            |        |                                                             |
|------------|--------|-------------------------------------------------------------|
| Human      | (2965) | IKYIDFNRYMRN-----LQFTTISLNFSTTKTEGLIIVWVGIAQNEENDFLAIGL     |
| Macaque    | (2965) | IKYIDFNRYMRN-----LQFTTISLNFSTTKTEGLIIVWVGIAQNEENDFLAIGL     |
| Chicken    | (2730) | IKYIDELYGKRD-----LQYSRISLNFSTNQIEGLMVWVGKAEDEDFLAIGL        |
| Zebrafish  | (2730) | LKYIDPKYNSRN-----LMHTEVSLNFSTAGDGLIIVWVGKAESEDDHDLAVGL      |
| Drosophila | (1963) | LILPPFRIPMKDKRRGPSLYVRPREAIVSLNFSTIEPDGLLIWSEHERSK---FLGLGL |

Laminin-G domain

|            |        |                                                               |
|------------|--------|---------------------------------------------------------------|
| Human      | (3014) | HNQTLKIAVNLGERISVPMSYNNGTFCCNK-WHHVVIQNTQLIKAYINNSLIILSEDDIDP |
| Macaque    | (3014) | HNQTLKIAVNLGERISVPMSYNNGTFCCNK-WHHVVIQNTQLIKAYINNSLIILSEDDIDP |
| Chicken    | (2779) | ANGRLKVINLGERISVPMIHSKDSICTDERWHFVTVIQNTCIKVIYLDDEELIFEDIDP   |
| Zebrafish  | (2779) | QDGYLKVSVNLGERTALPLVYQNSFCCNYW--NYLSITHNRTLIVYVNEERVIFEDIDP   |
| Drosophila | (2020) | EAGHLKIASNLLGSTNDTVRAPASCFIADGAWHTSVLLDRSRLEQLDGEVIFTERLPE    |

Laminin-G domain

|            |        |                                                            |
|------------|--------|------------------------------------------------------------|
| Human      | (3073) | -----HKNEVALNYDGIQYVGGFEYGRKVNIVTQEIFKTNFVGGKI             |
| Macaque    | (3073) | -----HKNEVALNYEGICVGGFEYGRKVNIVTQEIFKTNFVGGKI              |
| Chicken    | (2839) | -----HRKVTALNYGGICVGGFEIGRKVHTATAGLFOKEEFGKI               |
| Zebrafish  | (2837) | -----FEQYAVVNYGGVIVLGGFELNRDVASVTSGVFTKGFEGSI              |
| Drosophila | (2080) | GGRSLGSTTPRSTLAGRRKNSSKEPTISYEDVYVGGFPNSDSVSRRTKGRFDFDFKCL |

Laminin-G domain

|            |        |                                        |
|------------|--------|----------------------------------------|
| Human      | (3113) | KDVVFFQE-PKNIELTK-LEGYNVYDGDEQNEVT---  |
| Macaque    | (3113) | KDVVFFQD-PKKIELTK-LEGYNVYDGDEQNEVT---  |
| Chicken    | (2879) | KDIALFQD-SKKIQLMK-GEGYNVHNGDHRN-----   |
| Zebrafish  | (2877) | KDVFLYQD-TKQLQFLOTCEGFNVYQGEE-----     |
| Drosophila | (2140) | QDIQFGAEPITAIISDFSTYQGENIGSCDLHGDEPLTV |

Signal peptide EGF domain EGF-like domain

Laminin-G domain Calcium-binding EGF-like domain

Residues identical in all sequences are white on a black background, whereas similar amino acids are white on a gray background. Residues that are present in at least three of the five proteins are indicated in black on a light gray background.
